# Supplementary material for: Is adaptation limited by mutation? A timescale-dependent effect of genetic diversity on the adaptive substitution rate in animals
Source: PubMed Central journal article supplement (PMC7162527; doi:10.1371/journal.pgen.1008668), 2020-04-06
Supplement: pgen.1008668.s004.pdf [file pgen.1008668.s004.pdf]

| species                     | Number of individuals | Chosen sample size | # non-synonymous SNPs | # synonymous SNPs | # SNPs total | #GC-cons, Non-synonymous SNPs | #GC-cons, Synonymous SNPs | #GC-cons, SNPs total |
|-----------------------------|-----------------------|--------------------|-----------------------|-------------------|--------------|-------------------------------|---------------------------|----------------------|
| <i>F. fusca</i>             | 8                     | 10                 | 4278                  | 6578              | 10856        | 270                           | 166                       | 436                  |
| <i>F. sanguinea</i>         | 10                    | 16                 | 3242                  | 5343              | 8585         | 363                           | 224                       | 587                  |
| <i>F. cunicularia</i>       | 6                     | 8                  | 4035                  | 6355              | 10390        | 212                           | 121                       | 333                  |
| <i>F. pratensis</i>         | 8                     | 12                 | 1773                  | 2235              | 4008         | 191                           | 87                        | 278                  |
| <i>M. galathea</i>          | 10                    | 10                 | 1190                  | 3309              | 4499         | 621                           | 346                       | 966                  |
| <i>M. jurina</i>            | 20                    | 32                 | 7310                  | 15926             | 23235        | 1863                          | 2036                      | 3898                 |
| <i>A. hyperanthus</i>       | 7                     | 8                  | 1441                  | 2385              | 3826         | 734                           | 350                       | 1084                 |
| <i>P. tithonus</i>          | 7                     | 10                 | 1534                  | 2372              | 3906         | 369                           | 278                       | 647                  |
| <i>P. bathseba</i>          | 8                     | 10                 | 1611                  | 2676              | 4287         | 395                           | 315                       | 710                  |
| <i>M. californianus</i>     | 16                    | 24                 | 6370                  | 13436             | 19806        | 1467                          | 2209                      | 3675                 |
| <i>M. trossulus</i>         | 10                    | 14                 | 6329                  | 18994             | 25323        | 1665                          | 3382                      | 5047                 |
| <i>M. galloprovincialis</i> | 9                     | 12                 | 3298                  | 9089              | 12387        | 839                           | 1665                      | 2504                 |
| <i>M. edulis</i>            | 10                    | 12                 | 5497                  | 15987             | 21485        | 1326                          | 2590                      | 3915                 |
| <i>A. chlorotica L1</i>     | 19                    | 26                 | 1751                  | 3094              | 4845         | 472                           | 442                       | 914                  |
| <i>A. chlorotica L2</i>     | 8                     | 8                  | 350                   | 554               | 904          | 69                            | 56                        | 126                  |
| <i>A. chlorotica L4</i>     | 9                     | 12                 | 3562                  | 7895              | 11457        | 701                           | 808                       | 1508                 |
| <i>A. icterica</i>          | 10                    | 12                 | 1657                  | 3778              | 5435         | 360                           | 387                       | 747                  |
| <i>L. terrestris</i>        | 9                     | 8                  | 238                   | 940               | 1178         | 38                            | 77                        | 115                  |
| <i>L. lacteus</i>           | 9                     | 12                 | 5896                  | 20421             | 26317        | 1292                          | 2495                      | 3788                 |
| <i>L. longissimus</i>       | 6                     | 8                  | 55                    | 99                | 154          | 11                            | 7                         | 18                   |
| <i>L. sanguineus</i>        | 9                     | 10                 | 954                   | 3248              | 4202         | 192                           | 397                       | 589                  |
| <i>L. ruber</i>             | 8                     | 12                 | 1028                  | 1691              | 2718         | 196                           | 168                       | 364                  |
| <i>H. sapiens</i>           | 19                    | 28                 | 2281                  | 2812              | 5093         | 264                           | 123                       | 387                  |
| <i>P. troglodytes</i>       | 20                    | 30                 | 4744                  | 6558              | 11302        | 559                           | 266                       | 825                  |
| <i>G. gorilla</i>           | 20                    | 30                 | 3649                  | 4842              | 8491         | 370                           | 180                       | 550                  |
| <i>P. anubis</i>            | 5                     | 8                  | 2038                  | 4006              | 6044         | 242                           | 164                       | 407                  |
| <i>P. abelii</i>            | 10                    | 16                 | 5687                  | 9300              | 14987        | 594                           | 360                       | 954                  |
| <i>M. mulatta</i>           | 19                    | 28                 | 5257                  | 9976              | 15232        | 608                           | 560                       | 1169                 |
| <i>A. platyrhynchos</i>     | 10                    | 16                 | 3796                  | 13089             | 16884        | 206                           | 438                       | 645                  |
| <i>A. cygnoides</i>         | 10                    | 14                 | 1296                  | 4824              | 6119         | 103                           | 127                       | 230                  |
| <i>M. gallopavo</i>         | 10                    | 10                 | 1005                  | 3791              | 4795         | 61                            | 52                        | 113                  |
| <i>N. meleagris</i>         | 10                    | 16                 | 1319                  | 6241              | 7560         | 90                            | 135                       | 224                  |
| <i>P. cristatus</i>         | 10                    | 14                 | 602                   | 2214              | 2816         | 48                            | 51                        | 99                   |
| <i>P. colchicus</i>         | 11                    | 14                 | 3051                  | 9703              | 12754        | 172                           | 172                       | 343                  |
| <i>P. major</i>             | 10                    | 16                 | 6906                  | 14414             | 21320        | 2702                          | 2292                      | 4994                 |
| <i>F. albicollis</i>        | 20                    | 16                 | 16242                 | 20681             | 36923        | 2818                          | 2224                      | 5042                 |
| <i>Corvus sp.</i>           | 10                    | 14                 | 817                   | 1355              | 2172         | 115                           | 83                        | 197                  |
| <i>G. difficilis</i>        | 8                     | 10                 | 2090                  | 3280              | 5370         | 374                           | 232                       | 606                  |
| <i>T. guttata</i>           | 20                    | 16                 | 36318                 | 102249            | 138567       | 6588                          | 7775                      | 14363                |
| <i>R. norvegicus</i>        | 12                    | 18                 | 5023                  | 10224             | 15246        | 645                           | 574                       | 1220                 |
| <i>M. arvalis</i>           | 7                     | 10                 | 1783                  | 6351              | 8134         | 232                           | 377                       | 609                  |
| <i>M. ochrogaster</i>       | 18                    | 18                 | 2455                  | 5340              | 7795         | 448                           | 354                       | 801                  |
| <i>M. spretus</i>           | 8                     | 12                 | 58687                 | 14289             | 72976        | 812                           | 921                       | 1733                 |
| <i>M. m. castaneus</i>      | 10                    | 12                 | 5524                  | 17996             | 23520        | 778                           | 1068                      | 1846                 |
| <i>D. melanogaster</i>      | 10                    | 16                 | 36213                 | 138306            | 174518       | 9574                          | 15862                     | 25436                |
| <i>D. teissieri</i>         | 11                    | 18                 | 48565                 | 247605            | 296171       | 14259                         | 35930                     | 50188                |
| <i>D. santomea</i>          | 17                    | 28                 | 16104                 | 54878             | 70982        | 2374                          | 4142                      | 6516                 |
| <i>D. yakuba</i>            | 20                    | 12                 | 37921                 | 164003            | 201924       | 11090                         | 22635                     | 33725                |
| <i>D. simulans</i>          | 10                    | 16                 | 74864                 | 352964            | 427828       | 21397                         | 47094                     | 68490                |
| <i>D. sechellia</i>         | 8                     | 12                 | 379                   | 591               | 970          | 92                            | 61                        | 153                  |

S3 Table : SNPs counts for each species.
