# Supplementary material for: Is adaptation limited by mutation? A timescale-dependent effect of genetic diversity on the adaptive substitution rate in animals
Source: PubMed Central journal article supplement (PMC7162527; doi:10.1371/journal.pgen.1008668), 2020-04-06
Supplement: pgen.1008668.s005.pdf [file pgen.1008668.s005.pdf]

| <b>taxonomic group</b> | <b>tree topologies references</b>                                                                                                                                                                                                                                            |
|------------------------|------------------------------------------------------------------------------------------------------------------------------------------------------------------------------------------------------------------------------------------------------------------------------|
| Catarrhine primates    | Perelman P, Johnson WE, Roos C, Seuánez HN, Horvath JE, Moreira MA, Kessing B, Pontius J, Roelke M, Rumpler Y, Schneider MP. 2011. A molecular phylogeny of living primates. <i>PLoS genetics</i> . 7(3):e1001342.                                                           |
| Galloanserae           | Wright AE, Harrison PW, Zimmer F, Montgomery SH, Pointer MA, Mank JE. 2015. Variation in promiscuity and sexual selection drives avian rate of Faster-Z evolution. <i>Molecular ecology</i> . 24(6):1218-35.                                                                 |
| Passeriformes          | Barker FK, Barrowclough GF, Groth JG. 2002. A phylogenetic hypothesis for passerine birds: taxonomic and biogeographic implications of an analysis of nuclear DNA sequence data. <i>Proceedings of the Royal Society B: Biological Sciences</i> 269:295–308.                 |
| Muroidea               | Steppan SJ, Adkins RM, Anderson J, Thorne J. 2004. Phylogeny and Divergence-Date Estimates of Rapid Radiations in Muroid Rodents Based on Multiple Nuclear Genes. <i>Systematic Biology</i> 53:533–553.                                                                      |
| Mussels                | Distel DL. 2000. Phylogenetic Relationships among Mytilidae (Bivalvia): 18S rRNA Data Suggest Convergence in Mytilid Body Plans. <i>Molecular Phylogenetics and Evolution</i> 15:25–33.                                                                                      |
| Satyrinae butterflies  | Peña C, Wahlberg N, Weingartner E, Kodandaramaiah U, Nylin S, Freitas AV, Brower AV. 2006. Higher level phylogeny of Satyrinae butterflies (Lepidoptera: Nymphalidae) based on DNA sequence data. <i>Molecular phylogenetics and evolution</i> . 40(1):29-49.                |
| Formica ants           | J. Romiguier, J. Rolland, C. Morandin, L. Keller. 2018. Phylogenomics of palearctic Formica species suggests a single origin of temporary parasitism and gives insights to the evolutionary pathway toward slave-making behaviour. <i>BMC evolutionary biology</i> 18(1):40. |
| Earth worms            | R. A. King, A. L. Tibble, W. O. C. Symondson. 2008. Opening a can of worms: unprecedented sympatric cryptic diversity within British lumbricid earthworms. <i>Molecular Ecology</i> 17, 4684-4698.                                                                           |
| Nemertea               | Thollesson, Mikael, and Jon L. Norenburg. 2003. Ribbon worm relationships: a phylogeny of the phylum Nemertea. <i>Proceedings of the Royal Society of London B: Biological Sciences</i> 27(1513): 407-415.                                                                   |
| Drosophila             | Obbard DJ, Maclennan J, Kim KW, Rambaut A, O'grady PM, Jiggins FM. 2012. Estimating divergence dates and substitution rates in the Drosophila phylogeny. <i>Molecular Biology and Evolution</i> . 29(11):3459-73.                                                            |

**S4 Table : Sources of the tree topologies of each taxonomic group used to estimate branch length and map substitutions.**
