# Supplementary material for: Is adaptation limited by mutation? A timescale-dependent effect of genetic diversity on the adaptive substitution rate in animals
Source: PLoS Genet. 2020 Apr 6;16(4):e1008668. doi: 10.1371/journal.pgen.1008668 (PMC7162527; doi:10.1371/journal.pgen.1008668)
Supplement: S2 Table — The differences in terms of number of orthogroups comes from the fact that we not only kept orthogroups with all species but also orthogroups with all species but one to estimate dN/dS value for each terminal branches in order to maximize the number of substitutions for data sets generated by exon capture. (XLSX) [file pgen.1008668.s003.xlsx]

## Sheet: Feuille1
Taxonomic group	minimum orthogroup number	maximum orthogroup number
ants	1249	1261
butterflies	1561	1671
earth worms	796	1460
Ribbon worms	1049	1413
mussles	1525	1525
primates	8604	8604
passerines	6755	6755
fowls	4439	4439
rodents	3994	3994
flies	7900	7900
